# Supplementary material for: Development and evaluation of antibody-capture immunoassays for detection of Lassa virus nucleoprotein-specific immunoglobulin M and G
Source: PubMed Central journal article supplement (PMC5892945; doi:10.1371/journal.pntd.0006361), 2018-03-29

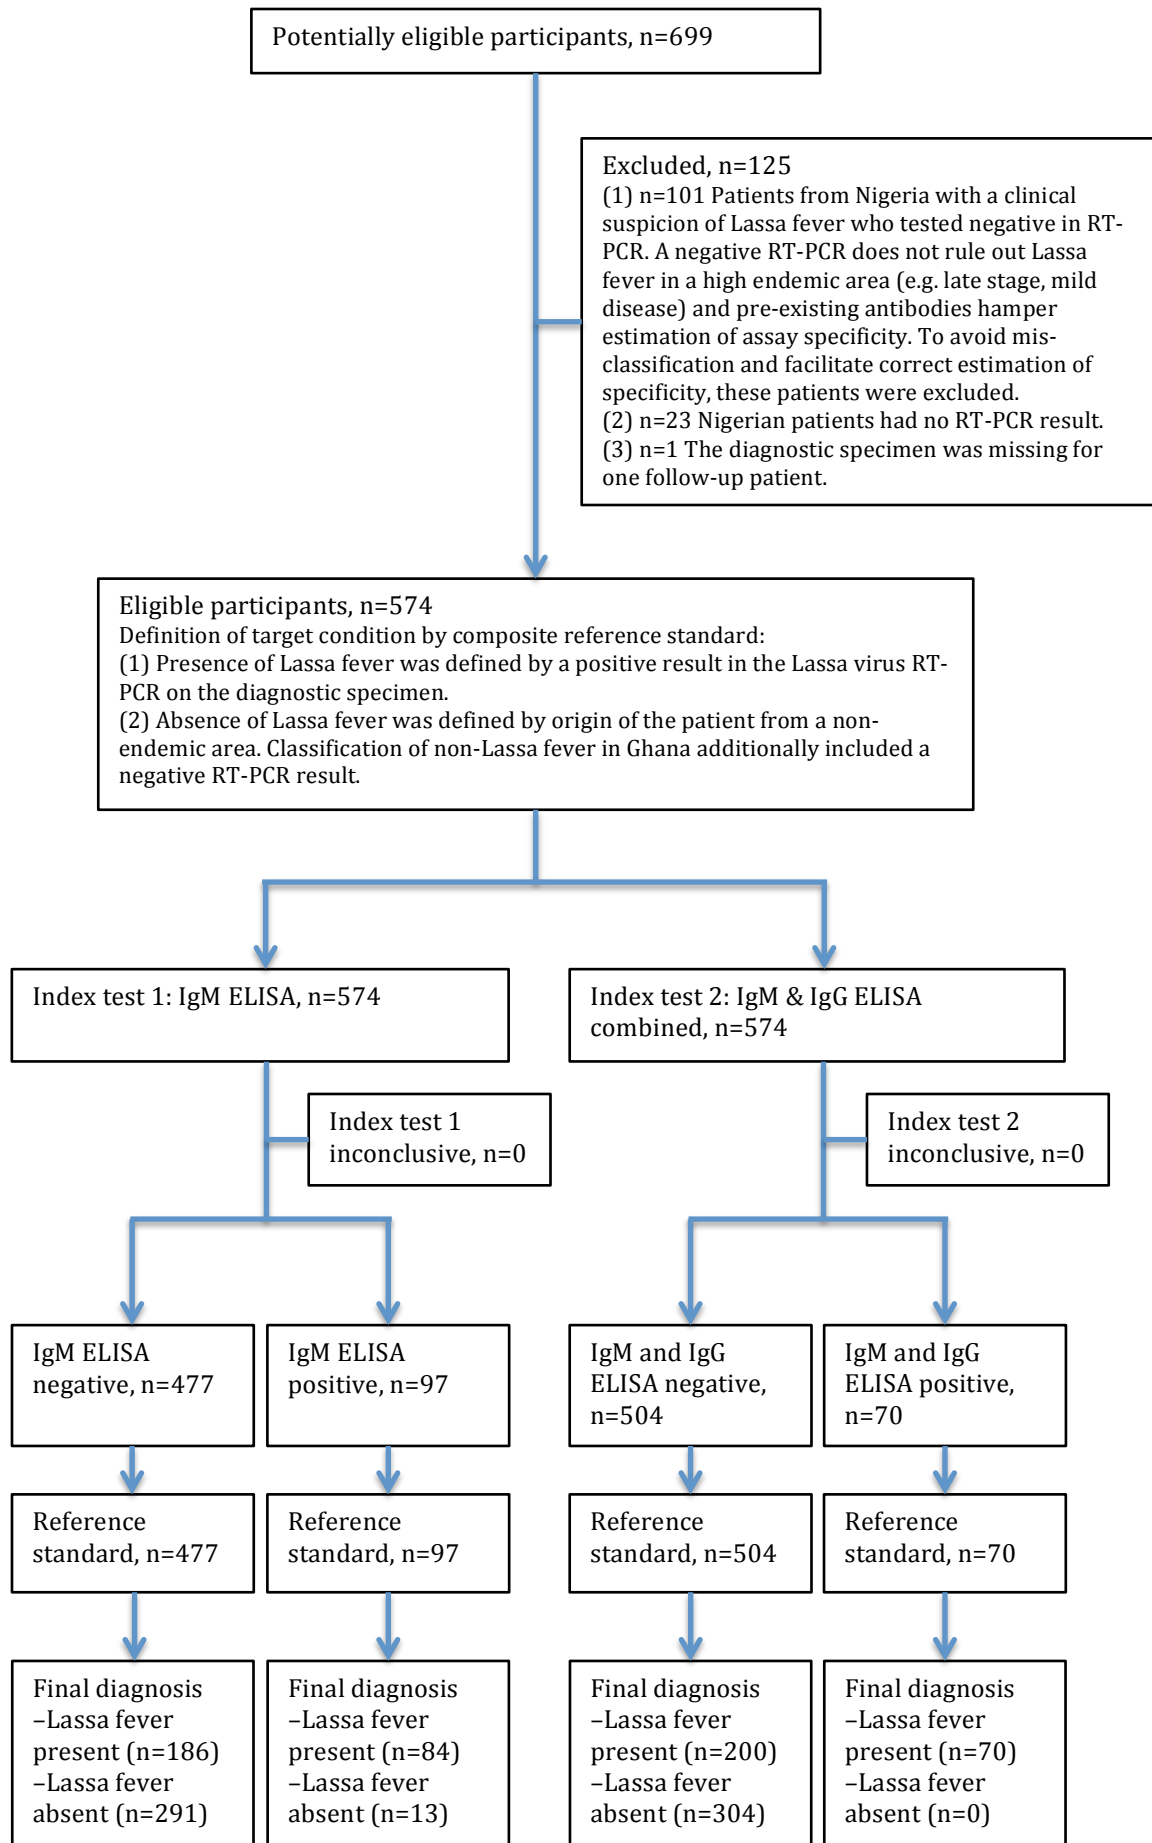

Supplement: pntd.0006361.s002.pdf [file pntd.0006361.s002.pdf]
